# Supplementary material for: Secondary Metabolites from Penicillium pinophilum SD-272, a Marine Sediment-Derived Fungus
Source: PubMed Central journal article supplement (PMC3721231; doi:10.3390/md11062230), 2013-06-21
Supplement: marinedrugs-11-02230-s001.pdf [file marinedrugs-11-02230-s001.pdf]

## Supplementary Information

|                                                                                                              |    |
|--------------------------------------------------------------------------------------------------------------|----|
| <b>Figure S1.</b> $^1\text{H}$ NMR (500 MHz, $\text{DMSO-}d_6$ ) spectrum of compound <b>1</b> .             | 2  |
| <b>Figure S2.</b> $^{13}\text{C}$ NMR (125 MHz, $\text{DMSO-}d_6$ ) and DEPT spectra of compound <b>1</b> .  | 2  |
| <b>Figure S3.</b> $^1\text{H}$ - $^1\text{H}$ COSY spectrum of the compound <b>1</b> .                       | 3  |
| <b>Figure S4.</b> HSQC spectrum of compound <b>1</b> .                                                       | 3  |
| <b>Figure S5.</b> HMBC spectrum of compound <b>1</b> .                                                       | 4  |
| <b>Figure S6.</b> $^1\text{H}$ NMR (500 MHz, $\text{DMSO-}d_6$ ) spectrum of compound <b>2</b> .             | 4  |
| <b>Figure S7.</b> $^{13}\text{C}$ NMR (125 MHz, $\text{DMSO-}d_6$ ) and DEPT spectra of compound <b>2</b> .  | 5  |
| <b>Figure S8.</b> $^1\text{H}$ - $^1\text{H}$ COSY spectrum of the compound <b>2</b> .                       | 5  |
| <b>Figure S9.</b> HSQC spectrum of compound <b>2</b> .                                                       | 6  |
| <b>Figure S10.</b> HMBC spectrum of compound <b>2</b> .                                                      | 6  |
| <b>Figure S11.</b> $^1\text{H}$ NMR (500 MHz, $\text{DMSO-}d_6$ ) spectrum of compound <b>3</b> .            | 7  |
| <b>Figure S12.</b> $^{13}\text{C}$ NMR (125 MHz, $\text{DMSO-}d_6$ ) and DEPT spectra of compound <b>3</b> . | 7  |
| <b>Figure S13.</b> $^1\text{H}$ - $^1\text{H}$ COSY spectrum of the compound <b>3</b> .                      | 8  |
| <b>Figure S14.</b> HSQC spectrum of compound <b>3</b> .                                                      | 8  |
| <b>Figure S15.</b> HMBC spectrum of compound <b>3</b> .                                                      | 9  |
| $^1\text{H}$ - and $^{13}\text{C}$ -NMR data of compound <b>4</b> .                                          | 9  |
| $^1\text{H}$ - and $^{13}\text{C}$ -NMR data of compound <b>5</b> .                                          | 9  |
| $^1\text{H}$ - and $^{13}\text{C}$ -NMR data of compound <b>6</b> .                                          | 9  |
| $^1\text{H}$ - and $^{13}\text{C}$ -NMR data of compound <b>7</b> .                                          | 10 |
| $^1\text{H}$ - and $^{13}\text{C}$ -NMR data of compound <b>8</b> .                                          | 10 |
| $^1\text{H}$ - and $^{13}\text{C}$ -NMR data of compound <b>9</b> .                                          | 10 |
| $^1\text{H}$ - and $^{13}\text{C}$ -NMR data of compound <b>10</b> .                                         | 10 |

**Figure S1.**  $^1\text{H}$  NMR (500 MHz,  $\text{DMSO-}d_6$ ) spectrum of compound **1**.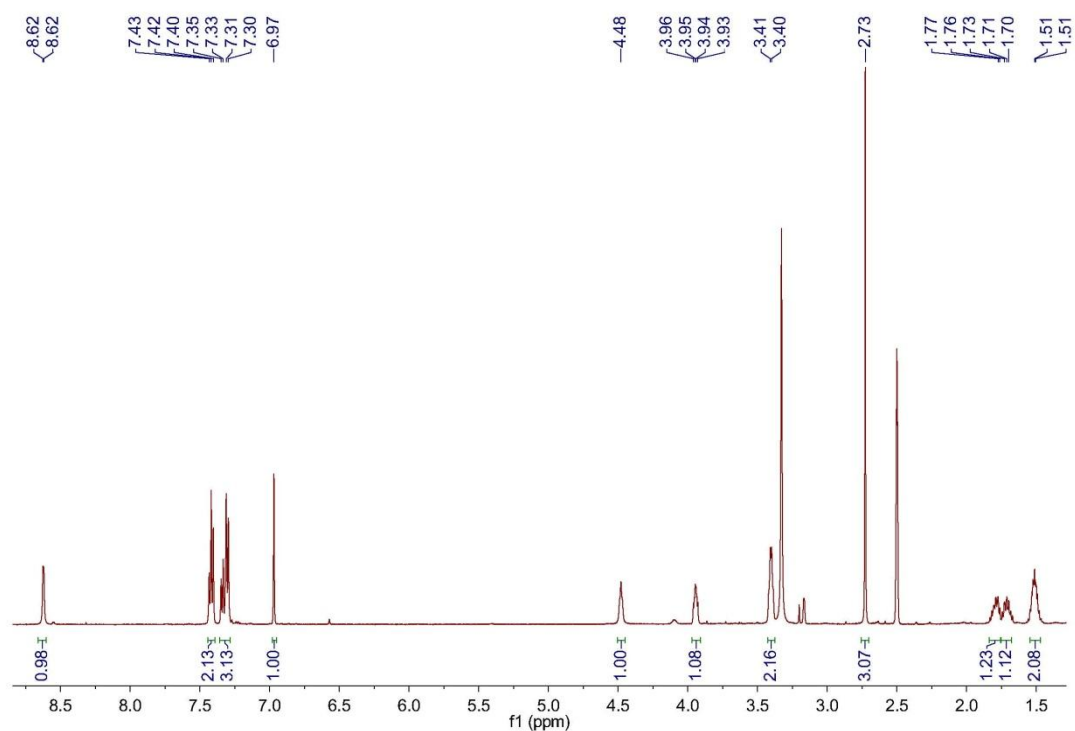**Figure S2.**  $^{13}\text{C}$  NMR (125 MHz,  $\text{DMSO-}d_6$ ) and DEPT spectra of compound **1**.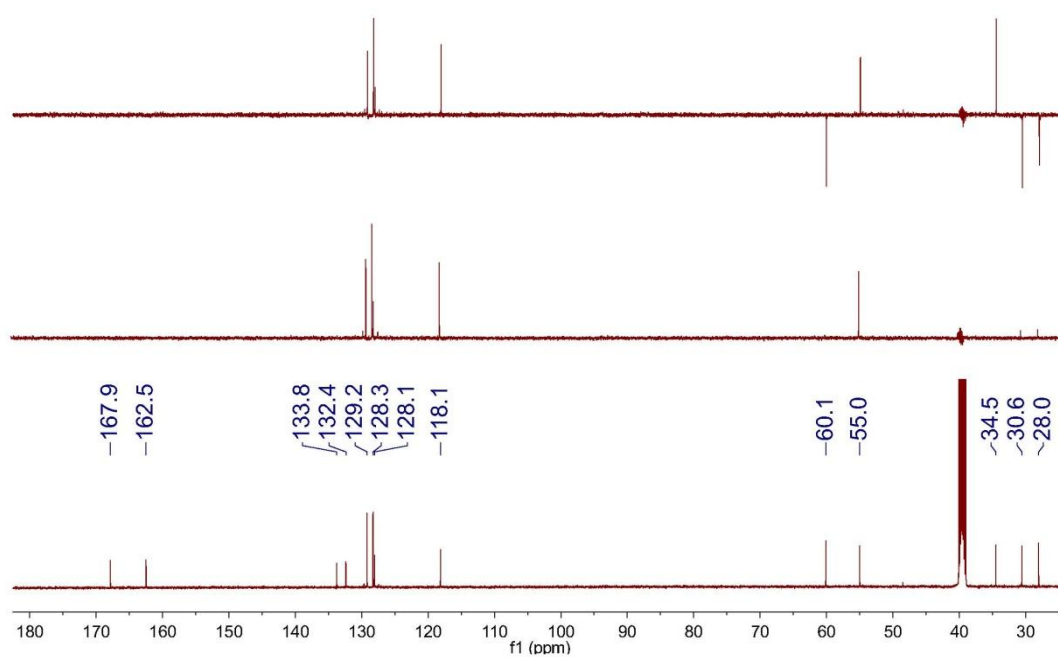

**Figure S3.**  $^1\text{H}$ - $^1\text{H}$  COSY spectrum of the compound **1**.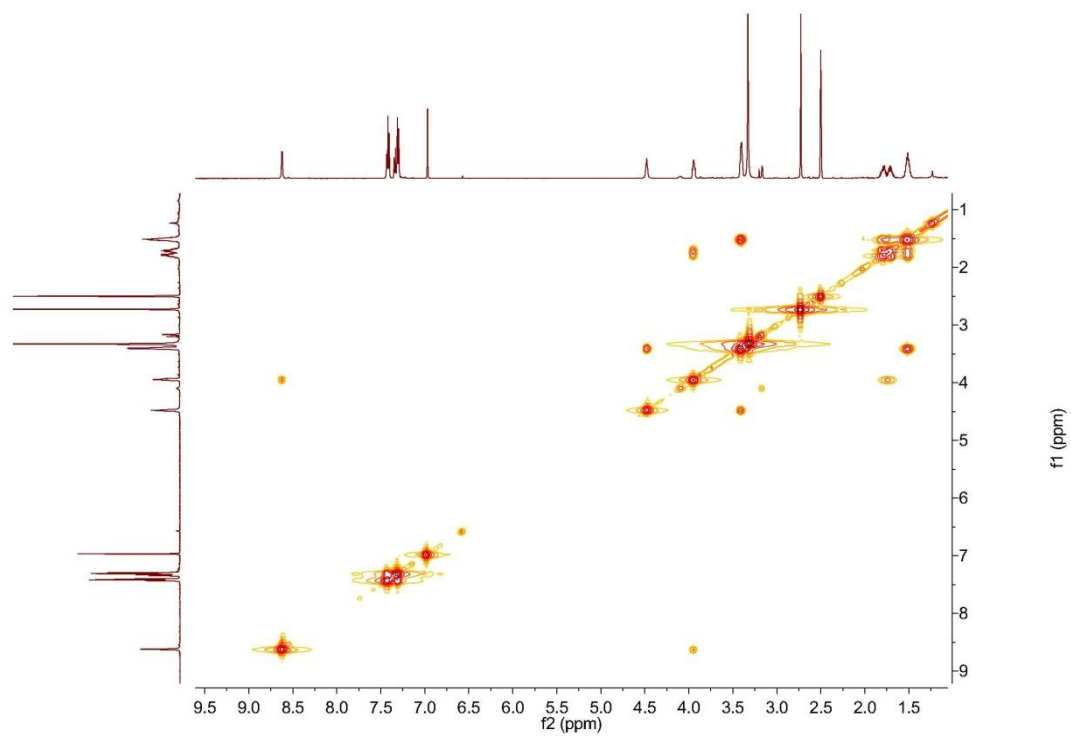**Figure S4.** HSQC spectrum of compound **1**.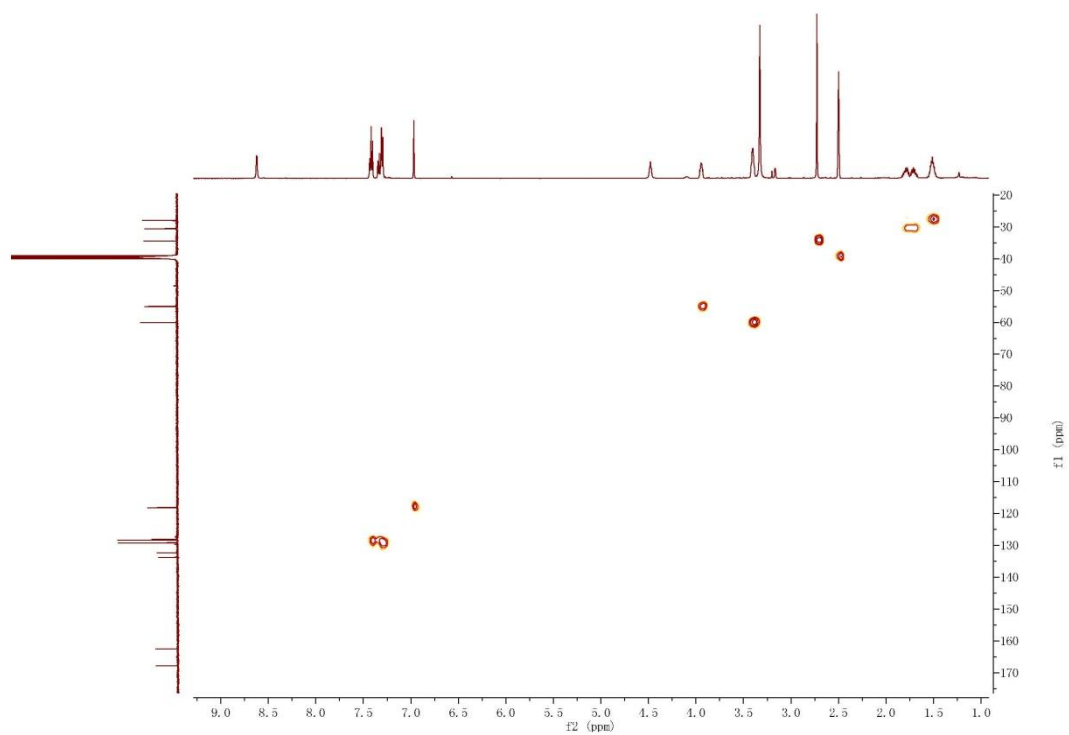

Figure S5. HMBC spectrum of compound 1.

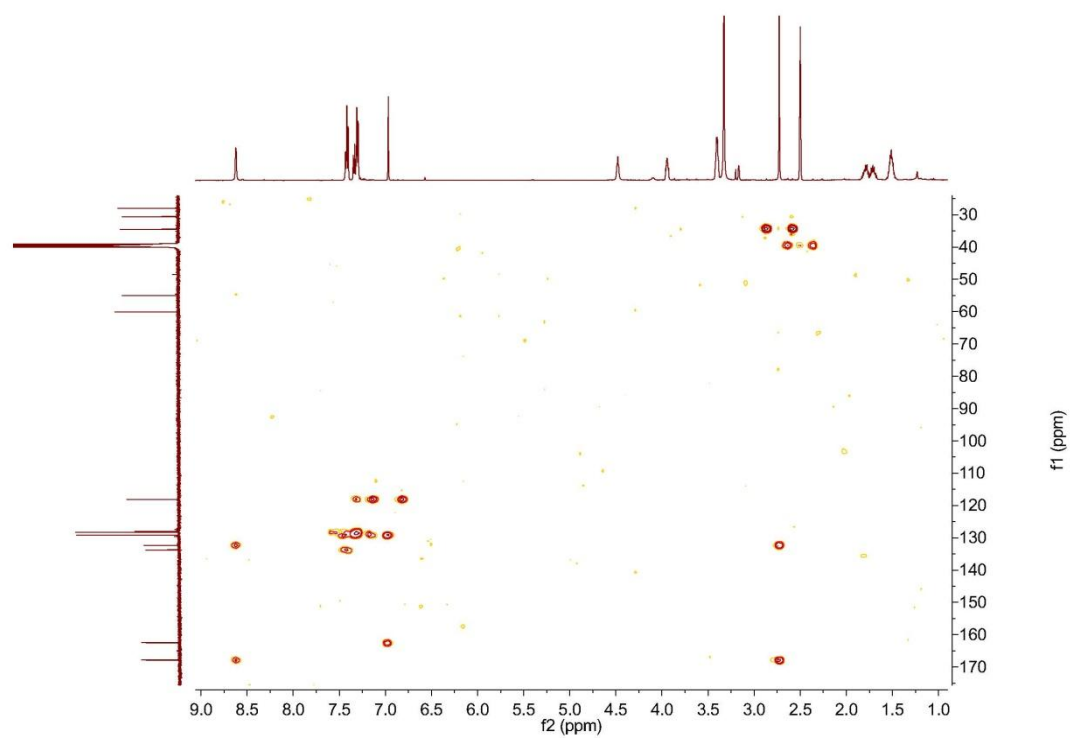Figure S6.  $^1\text{H}$  NMR (500 MHz,  $\text{DMSO}-d_6$ ) spectrum of compound 2.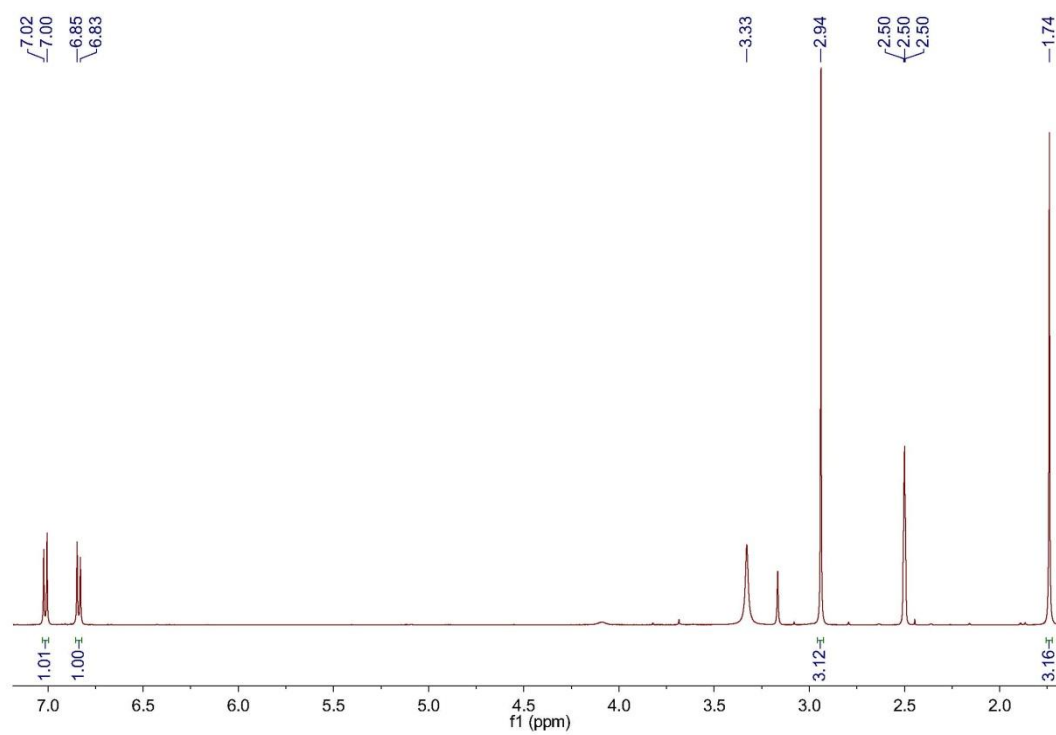

**Figure S7.**  $^{13}\text{C}$  NMR (125 MHz,  $\text{DMSO-}d_6$ ) and DEPT spectra of compound **2**.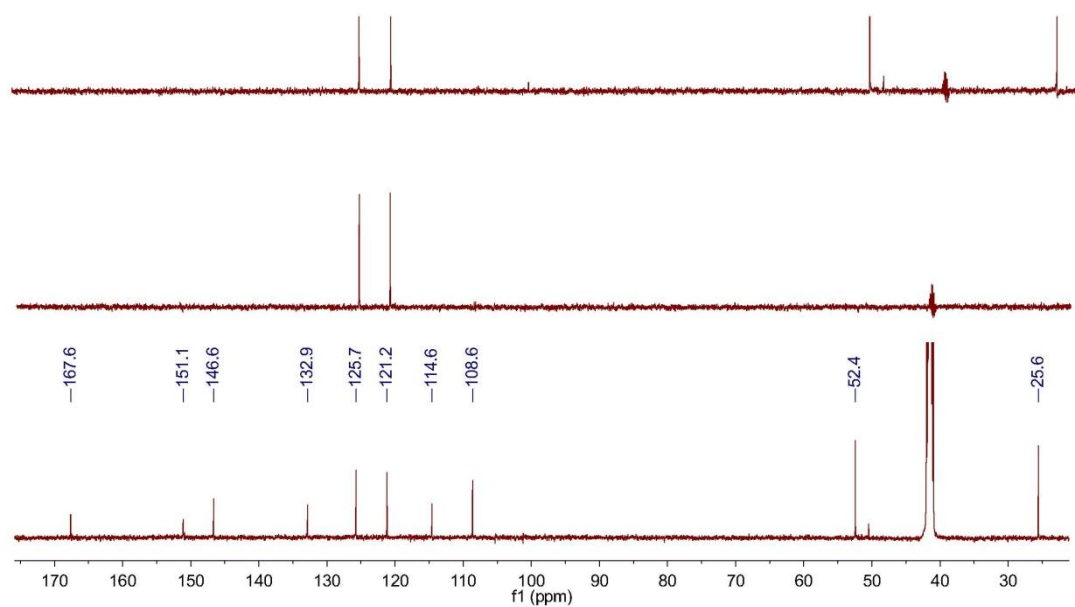**Figure S8.**  $^1\text{H}$ - $^1\text{H}$  COSY spectrum of the compound **2**.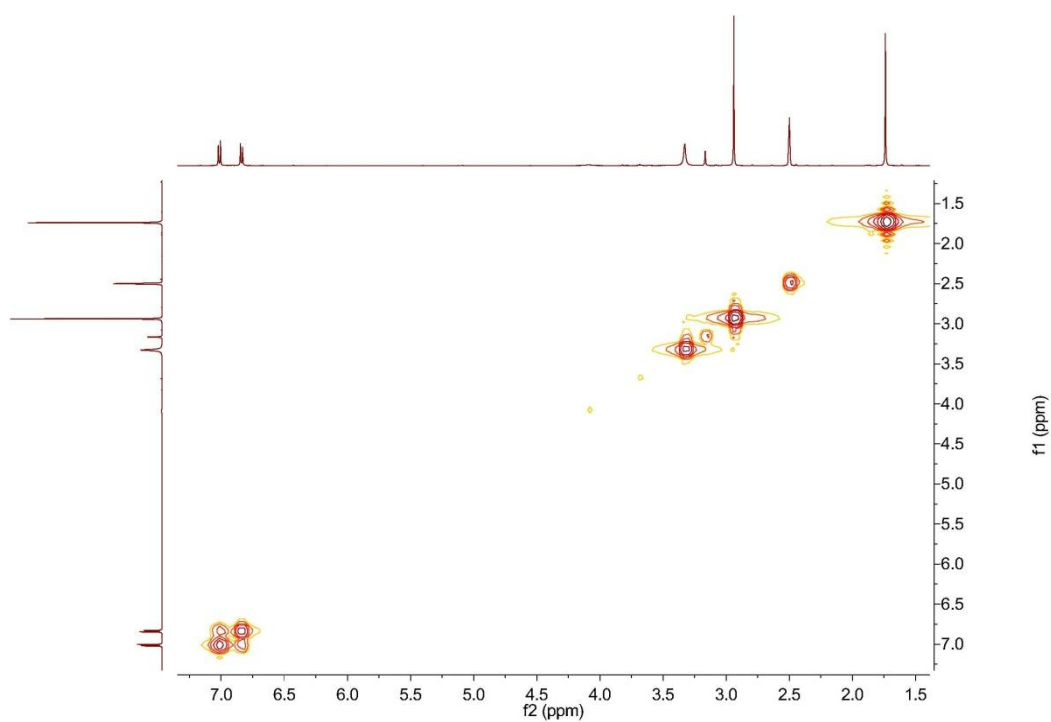

Figure S9. HSQC spectrum of compound 2.

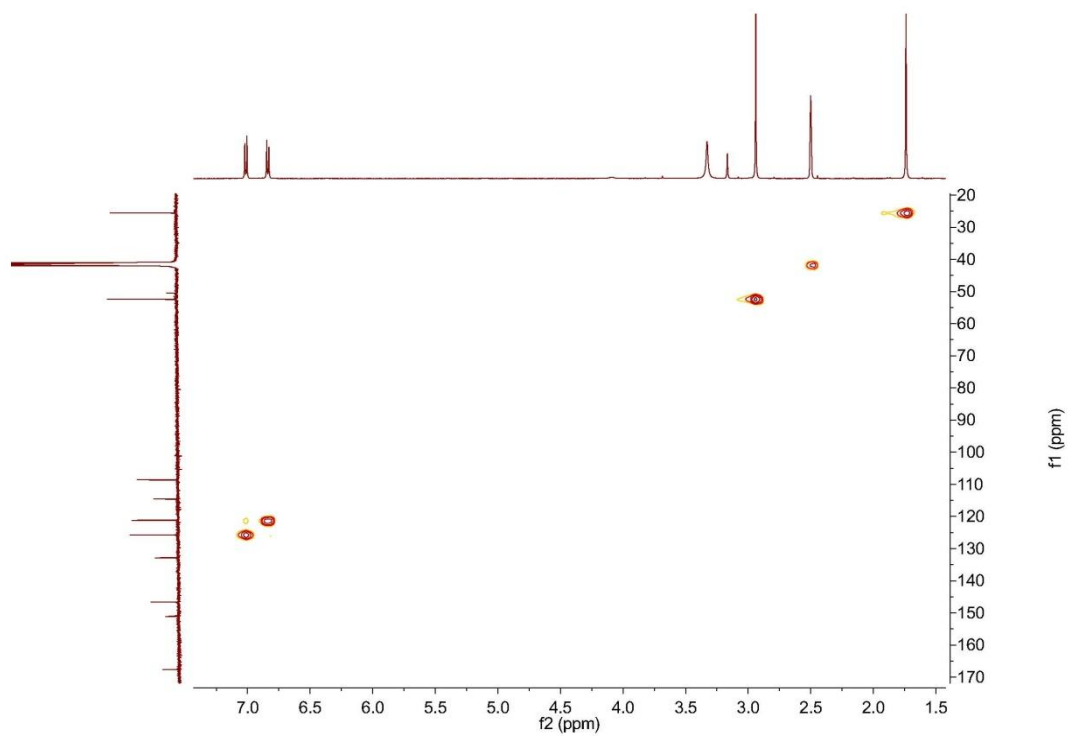

Figure S10. HMBC spectrum of compound 2.

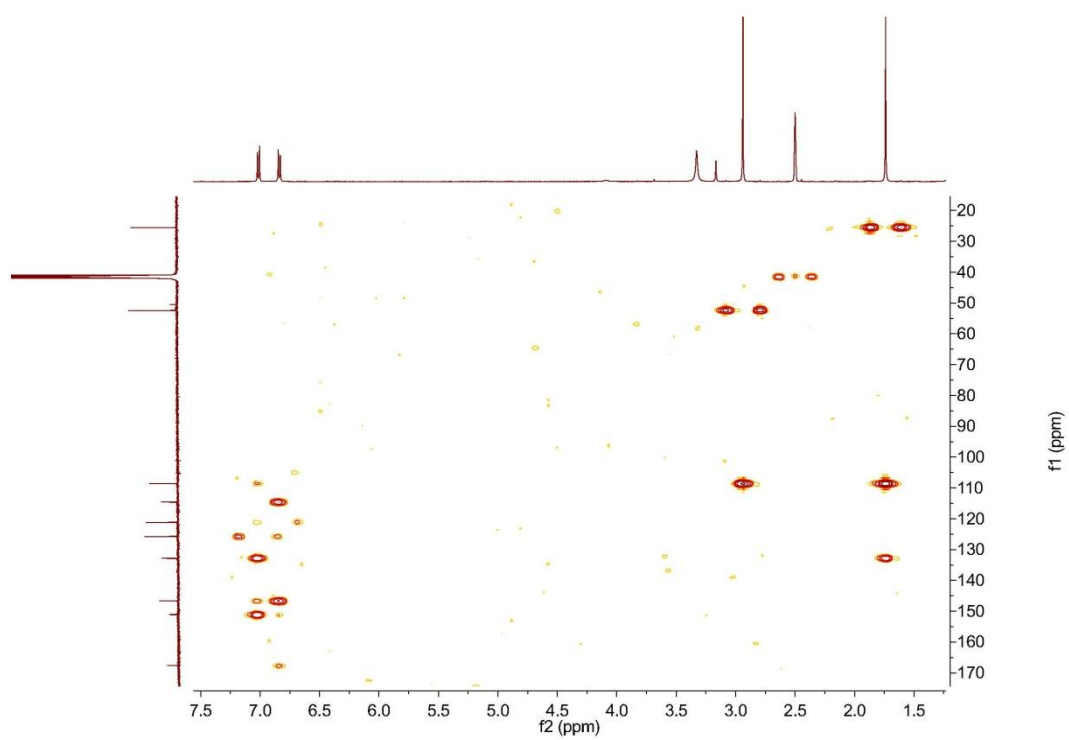

**Figure S11.**  $^1\text{H}$  NMR (500 MHz,  $\text{DMSO-}d_6$ ) spectrum of compound 3.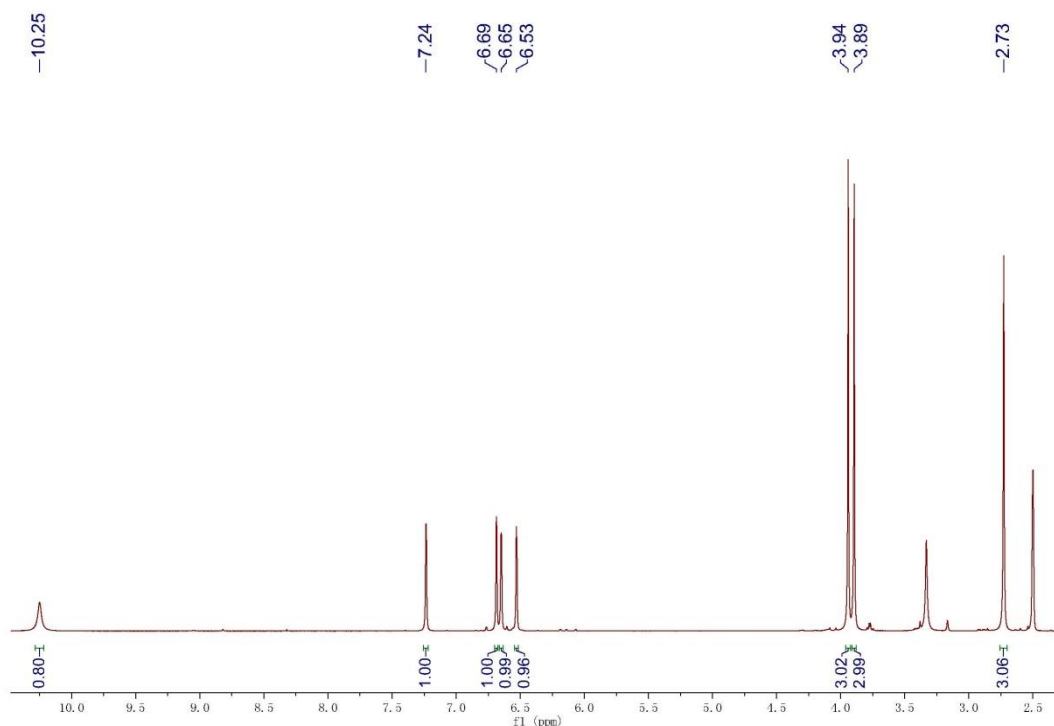**Figure S12.**  $^{13}\text{C}$  NMR (125 MHz,  $\text{DMSO-}d_6$ ) and DEPT spectra of compound 3.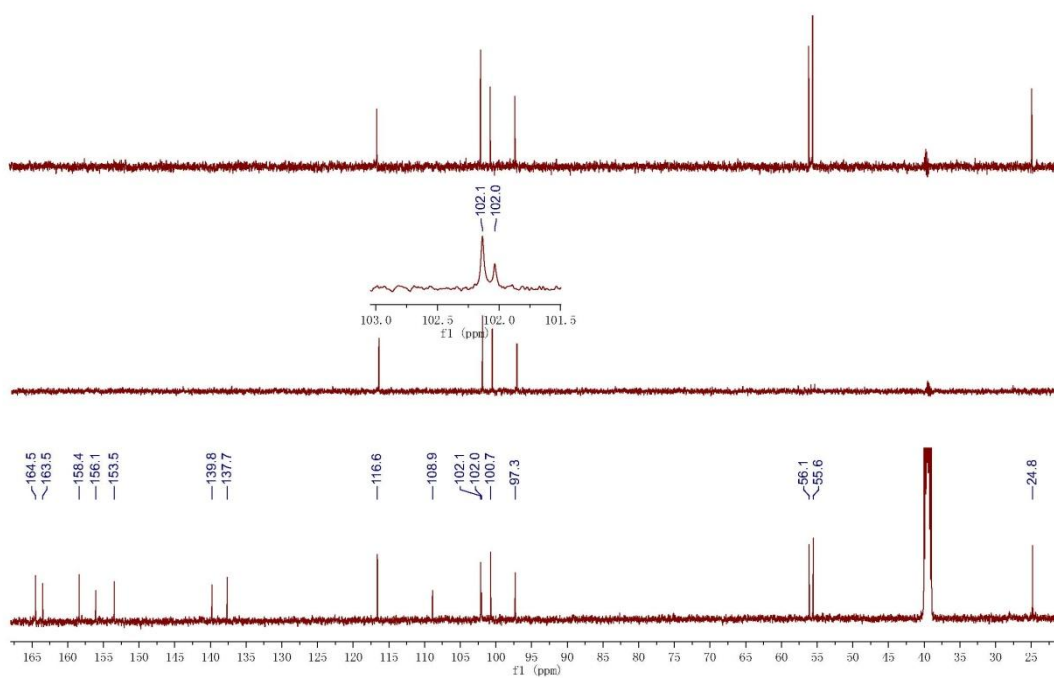

**Figure S13.**  $^1\text{H}$ - $^1\text{H}$  COSY spectrum of the compound **3**.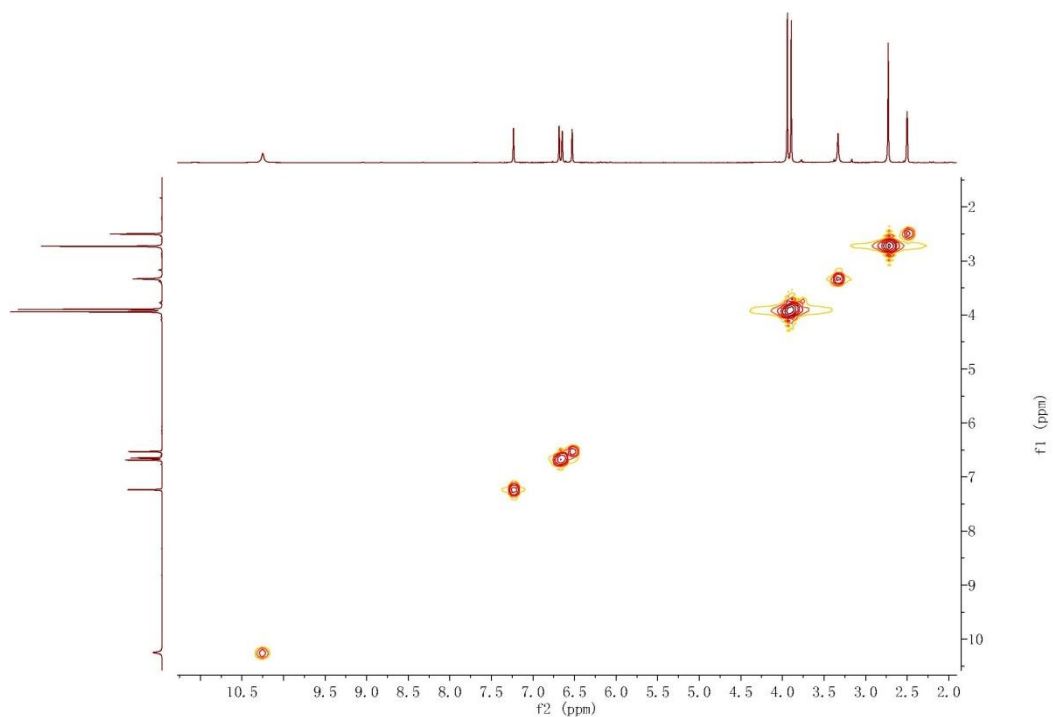**Figure S14.** HSQC spectrum of compound **3**.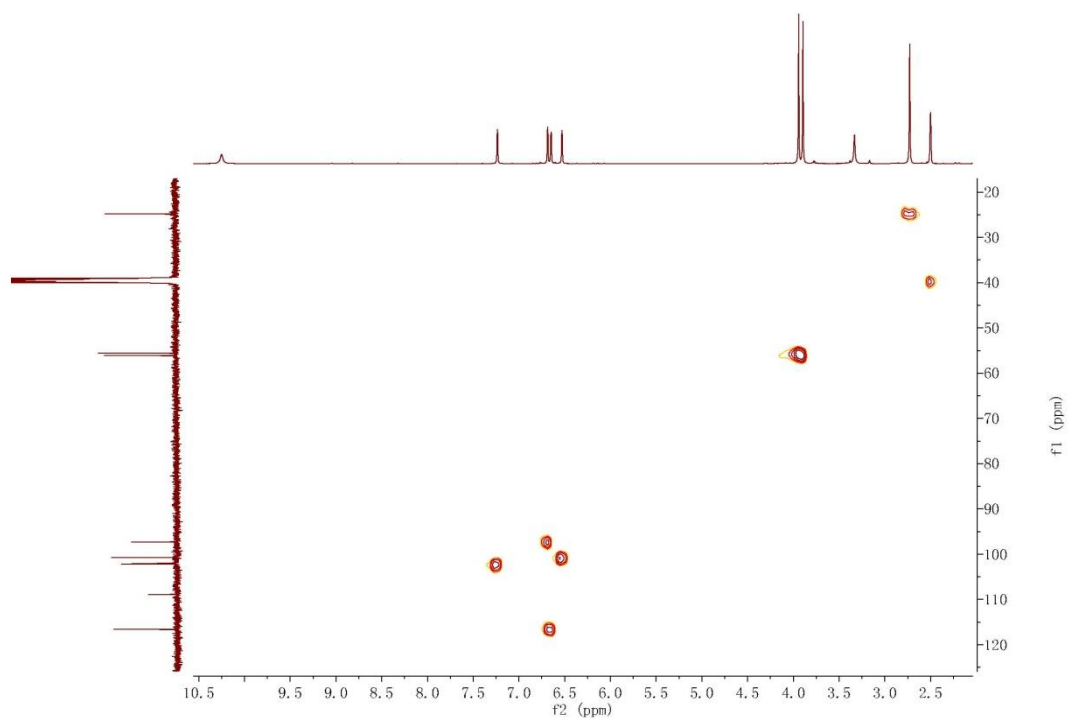



Figure S15. HMBC spectrum of compound 3.

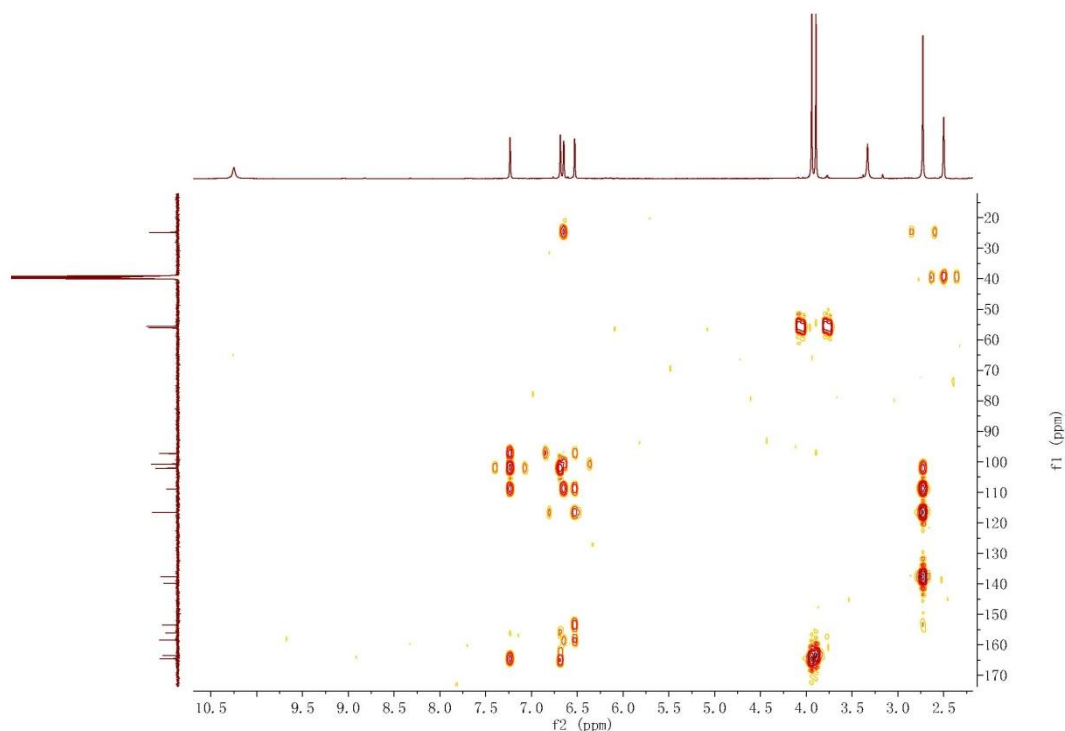

#### <sup>1</sup>H- and <sup>13</sup>C-NMR Data of Compound 4

Colorless oil; <sup>1</sup>H NMR data (at 500 MHz in DMSO-*d*<sub>6</sub>): δ<sub>H</sub> 4.18 (1H, ddd, *J* = 9.0, 4.1, 0.7 Hz, H-2), 2.33 (1H, m, H-3a), 1.98 (1H, m, H-3b), 2.14 (2H, m, H-4), 7.98 (1H, br s, H-6), 3.67 (3H, s, H-7); <sup>13</sup>C NMR data (at 125 MHz in DMSO-*d*<sub>6</sub>): δ<sub>C</sub> 173.3 (C-1, C), 54.6 (C-2, CH), 24.4 (C-3, CH<sub>2</sub>), 28.8 (C-4, CH<sub>2</sub>), 176.9 (C-5, C), 52.0 (C-7, CH<sub>3</sub>).

#### <sup>1</sup>H- and <sup>13</sup>C-NMR Data of Compound 5

Yellow oil; [α]<sub>D</sub><sup>27</sup> +90 (c 0.10, MeOH); <sup>1</sup>H NMR data (at 500 MHz in DMSO-*d*<sub>6</sub>): δ<sub>H</sub> 3.48 (2H, m, H-3), 1.88 (2H, m, H-4), 2.21 (1H, m, H-5a), 1.94 (1H, m, H-5b), 4.44 (1H, dd, *J* = 9.2, 7.1 Hz, H-6), 6.94 (1H, s, H-10), 2.73 (3H, s, H-11), 7.43-7.31 (5H, m, H-2', 3', 4', 5', 6'); <sup>13</sup>C NMR data (at 125 MHz in DMSO-*d*<sub>6</sub>): δ<sub>C</sub> 167.7 (C-1, C), 44.8 (C-3, CH<sub>2</sub>), 22.2 (C-4, CH<sub>2</sub>), 27.4 (C-5, CH<sub>2</sub>), 58.0 (C-6, CH), 160.0 (C-7, C), 134.2 (C-9, C), 118.6 (C-10, CH), 34.1 (C-11, CH<sub>3</sub>), 133.6 (C-1', C), 129.4 (C-2', CH), 128.3 (C-3', CH), 128.1 (C-4', CH), 128.3 (C-5', CH), 129.4 (C-6', CH).

#### <sup>1</sup>H- and <sup>13</sup>C-NMR Data of Compound 6

Yellow oil; <sup>1</sup>H NMR data (at 500 MHz in DMSO-*d*<sub>6</sub>): δ<sub>H</sub> 3.52 (1H, dd, *J* = 12.5, 4.7 Hz, H-3a), 3.16 (1H, m, H-3b), 4.19 (1H, m, H-4), 1.94 (1H, dd, *J* = 12.9, 6.3 Hz, H-5a), 1.52 (1H, m, H-5b), 4.29 (1H, dd, *J* = 11.0, 6.2 Hz, H-6), 7.98 (1H, br s, H-8), 4.40 (1H, t, *J* = 4.9 Hz, H-9), 3.08 (1H, dd, *J* = 14.2, 5.3 Hz, H-10a), 3.01 (1H, dd, *J* = 14.2, 5.3 Hz, H-10b), 5.09 (1H, d, *J* = 2.4 Hz, 4-OH), 7.21-7.17 (5H, m, H-2', 3', 4', 5', 6'); <sup>13</sup>C NMR data (at 125 MHz in DMSO-*d*<sub>6</sub>): δ<sub>C</sub> 170.7 (C-1, C), 54.0 (C-3, CH<sub>2</sub>), 66.6

(C-4, CH), 37.4 (C-5, CH<sub>2</sub>), 56.8 (C-6, CH), 165.4 (C-7, C), 55.4 (C-9, CH), 35.3 (C-10, CH<sub>2</sub>), 137.4 (C-1', C), 129.7 (C-2', CH), 128.0 (C-3', CH), 126.3 (C-4', CH), 128.0 (C-5', CH), 129.7 (C-6', CH).

#### **<sup>1</sup>H- and <sup>13</sup>C-NMR Data of Compound 7**

Yellow oil; <sup>1</sup>H NMR data (at 500 MHz in DMSO-*d*<sub>6</sub>): δ<sub>H</sub> 3.40 (1H, m, H-3a), 3.33 (1H, m, H-3b), 1.80 (2H, m, H-4), 2.12 (1H, m, H-5a), 1.84 (1H, m, H-5b), 4.13 (1H, m, H-6), 7.96 (H, br s, H-8), 3.91 (1H, s, H-9), 2.34 (1H, m, H-10), 1.01 (3H, d, *J* = 7.2 Hz, H-11), 0.84 (3H, d, *J* = 6.8 Hz, H-12); <sup>13</sup>C NMR data (at 125 MHz in DMSO-*d*<sub>6</sub>): δ<sub>C</sub> 170.2 (C-1, C), 44.6 (C-3, CH<sub>2</sub>), 22.0 (C-4, CH<sub>2</sub>), 27.8 (C-5, CH<sub>2</sub>), 58.2 (C-6, CH), 165.2 (C-7, C), 59.4 (C-9, CH), 27.7 (C-10, CH), 18.3 (C-11, CH<sub>3</sub>), 16.4 (C-12, CH<sub>3</sub>).

#### **<sup>1</sup>H- and <sup>13</sup>C-NMR Data of Compound 8**

Yellow amorphous powder; <sup>1</sup>H NMR data (at 500 MHz in DMSO-*d*<sub>6</sub>): δ<sub>H</sub> 6.72 (1H, s, H-3), 6.38 (1H, s, H-7), 3.42 (3H, s, H-8), 2.05 (3H, s, H-9); <sup>13</sup>C NMR data (at 125 MHz in DMSO-*d*<sub>6</sub>): δ<sub>C</sub> 168.7 (C-1, C), 101.0 (C-3, CH), 121.7 (C-3a, C), 151.5 (C-4, C), 118.7 (C-5, C), 158.8 (C-6, C), 102.1 (C-7, CH), 124.8 (C-7a, C), 55.3 (C-8, CH<sub>3</sub>), 9.1 (C-9, CH<sub>3</sub>).

#### **<sup>1</sup>H- and <sup>13</sup>C-NMR Data of Compound 9**

Yellow oil; <sup>1</sup>H NMR data (at 500 MHz in DMSO-*d*<sub>6</sub>): δ<sub>H</sub> 6.50 (1H, d, *J* = 2.3 Hz, H-4), 6.67 (1H, d, *J* = 2.3 Hz, H-6), 2.26 (1H, dd, *J* = 14.1, 3.3 Hz, H-3'a), 1.95 (1H, dd, *J* = 14.1, 7.4 Hz, H-3'b), 3.69 (1H, m, H-4'), 3.95 (1H, s, H-5'), 5.15 (1H, d, *J* = 3.6 Hz, 4'-OH), 5.31 (1H, d, *J* = 6.1 Hz, 5'-OH), 6.30 (1H, d, *J* = 3.2 Hz, H-6'), 1.47 (3H, s, 2'-CH<sub>3</sub>), 3.86 (3H, s, 5-OCH<sub>3</sub>), 11.30 (1H, br s, 3-OH); <sup>13</sup>C NMR data (at 125 MHz in DMSO-*d*<sub>6</sub>): δ<sub>C</sub> 131.0 (C-1, C), 99.8 (C-2, C), 165.8 (C-3, C), 100.9 (C-4, CH), 163.0 (C-5, C), 55.8 (5-OCH<sub>3</sub>), 102.0 (C-6, CH), 168.2 (C-7, C), 26.2 (2'-CH<sub>3</sub>), 139.2 (C-1', C), 81.1 (C-2', C), 38.6 (C-3', CH<sub>2</sub>), 68.7 (C-4', CH), 69.5 (C-5', CH), 131.2 (C-6', CH).

#### **<sup>1</sup>H- and <sup>13</sup>C-NMR Data of Compound 10**

Yellow oil; <sup>1</sup>H NMR data (at 500 MHz in DMSO-*d*<sub>6</sub>): δ<sub>H</sub> 6.50 (1H, d, *J* = 2.3 Hz, H-4), 6.74 (1H, d, *J* = 2.3 Hz, H-6), 2.16 (1H, dd, *J* = 11.9, 3.6 Hz, H-3'a), 2.03 (1H, t, *J* = 11.9 Hz, H-3'b), 3.61 (1H, m, H-4'), 4.09 (1H, m, H-5'), 5.22 (1H, d, *J* = 5.0 Hz, 4'-OH), 5.38 (1H, d, *J* = 6.1 Hz, 5'-OH), 6.25 (1H, d, *J* = 2.4 Hz, H-6'), 1.49 (3H, s, 2'-CH<sub>3</sub>), 3.86 (3H, s, 5-OCH<sub>3</sub>), 11.34 (1H, br s, 3-OH); <sup>13</sup>C NMR data (at 125 MHz in DMSO-*d*<sub>6</sub>): δ<sub>C</sub> 131.8 (C-1, C), 100.0 (C-2, C), 165.8 (C-3, C), 101.2 (C-4, CH), 163.2 (C-5, C), 55.8 (5-OCH<sub>3</sub>), 102.3 (C-6, CH), 167.8 (C-7, C), 27.4 (2'-CH<sub>3</sub>), 137.6 (C-1', C), 82.2 (C-2', C), 43.4 (C-3', CH<sub>2</sub>), 70.2 (C-4', CH), 72.5 (C-5', CH), 131.0 (C-6', CH).
