# Supplementary material for: Secondary Metabolites from Penicillium pinophilum SD-272, a Marine Sediment-Derived Fungus
Source: MDPI journal article supplement (doi:10.3390/md11062230), 2013-06-21
Supplement: s2 [file s2]

marinedrugs-11-02230-s001.mol
  corina  04151402473D 1   1.00000     0.00000 
CORINA 3.49 0023  12.04.2013
 21 22  0  0  0  0  0  0  0  0999 V2000
    0.1417    1.0794    0.2582 C   0  0  0  0  0  0  0  0  0  0  0  0
    0.1021   -0.0573   -0.5304 C   0  0  0  0  0  0  0  0  0  0  0  0
    1.2292   -0.4699   -1.2197 C   0  0  0  0  0  0  0  0  0  0  0  0
    2.4014    0.2500   -1.1255 C   0  0  0  0  0  0  0  0  0  0  0  0
    2.4496    1.3998   -0.3307 C   0  0  0  0  0  0  0  0  0  0  0  0
    1.3064    1.8101    0.3628 C   0  0  0  0  0  0  0  0  0  0  0  0
    1.6453    3.5169   -1.6766 C   0  0  0  0  0  0  0  0  0  0  0  0
    2.5737    4.2144   -0.7835 N   0  0  0  0  0  0  0  0  0  0  0  0
    3.6551    3.5254   -0.2182 C   0  0  0  0  0  0  0  0  0  0  0  0
    3.6964    2.1735   -0.2243 C   0  0  0  0  0  0  0  0  0  0  0  0
    2.3931    5.5161   -0.5096 C   0  0  0  0  0  0  0  0  0  0  0  0
    3.2766    6.2773    0.4296 C   0  0  0  0  0  0  0  0  0  0  0  0
    4.5495    5.6107    0.6616 N   0  0  0  0  0  0  0  0  0  0  0  0
    4.7460    4.3126    0.3825 C   0  0  0  0  0  0  0  0  0  0  0  0
    2.5525    6.4406    1.7674 C   0  0  0  0  0  0  0  0  0  0  0  0
    3.3894    7.3226    2.6961 C   0  0  0  0  0  0  0  0  0  0  0  0
    2.6653    7.4858    4.0339 C   0  0  0  0  0  0  0  0  0  0  0  0
    3.4470    8.3096    4.9013 O   0  0  0  0  0  0  0  0  0  0  0  0
    5.8156    3.7879    0.6289 O   0  0  0  0  0  0  0  0  0  0  0  0
    1.4756    6.1006   -1.0460 O   0  0  0  0  0  0  0  0  0  0  0  0
    3.4673    7.2656    0.0113 H   0  0  0  0  0  0  0  0  0  0  0  0
  1  2  2  0      
  2  3  1  0      
  3  4  2  0      
  4  5  1  0      
  5  6  2  0      
  6  1  1  0      
  7  8  1  0      
  8  9  1  0      
  9 10  2  0      
 10  5  1  0      
  8 11  1  0      
 11 12  1  0      
 12 13  1  0      
 13 14  1  0      
 14  9  1  0      
 15 16  1  0      
 16 17  1  0      
 17 18  1  0      
 14 19  2  0      
 11 20  2  0      
 12 15  1  0      
 12 21  1  0      
M  END
$$$$
