# Supplementary material for: Secondary Metabolites from Penicillium pinophilum SD-272, a Marine Sediment-Derived Fungus
Source: MDPI journal article supplement (doi:10.3390/md11062230), 2013-06-21
Supplement: s4 [file s4]

marinedrugs-11-02230-s002.mol
  corina  04151402473D 1   1.00000     0.00000 
CORINA 3.49 0023  12.04.2013
 15 16  0  0  0  0  0  0  0  0999 V2000
   -0.0167    1.3801    0.0096 C   0  0  0  0  0  0  0  0  0  0  0  0
    0.0021   -0.0041    0.0020 C   0  0  0  0  0  0  0  0  0  0  0  0
    1.2092   -0.6868   -0.0128 C   0  0  0  0  0  0  0  0  0  0  0  0
    2.3943    0.0069   -0.0204 C   0  0  0  0  0  0  0  0  0  0  0  0
    2.3962    1.4071   -0.0134 C   0  0  0  0  0  0  0  0  0  0  0  0
    1.1773    2.0956    0.0021 C   0  0  0  0  0  0  0  0  0  0  0  0
    3.8416   -0.4171   -0.0361 C   0  0  0  0  0  0  0  0  0  0  0  0
    4.6272    0.8063   -0.0373 O   0  0  0  0  0  0  0  0  0  0  0  0
    3.7951    1.8614   -0.0242 C   0  0  0  0  0  0  0  0  0  0  0  0
    1.1600    3.4528    0.0086 O   0  0  0  0  0  0  0  0  0  0  0  0
   -1.2045    2.0424    0.0189 O   0  0  0  0  0  0  0  0  0  0  0  0
    4.1478    3.0242   -0.0213 O   0  0  0  0  0  0  0  0  0  0  0  0
    4.1601   -1.2445    1.2109 C   0  0  0  0  0  0  0  0  0  0  0  0
    4.1171   -1.1781   -1.2139 O   0  0  0  0  0  0  0  0  0  0  0  0
    5.4709   -1.6243   -1.3142 C   0  0  0  0  0  0  0  0  0  0  0  0
  1  2  2  0      
  2  3  1  0      
  3  4  2  0      
  4  5  1  0      
  5  6  2  0      
  6  1  1  0      
  4  7  1  0      
  7  8  1  0      
  8  9  1  0      
  9  5  1  0      
  6 10  1  0      
  1 11  1  0      
  9 12  2  0      
  7 13  1  0      
  7 14  1  0      
 14 15  1  0      
M  STY  1   1 SUP
M  SLB  1   1   1
M  SAL   1  2  14  15
M  SBL   1  1  15
M  SMT   1 OMe
M  SBV   1 15   -6.1200    5.5796
M  END
$$$$
