# Supplementary material for: Secondary Metabolites from Penicillium pinophilum SD-272, a Marine Sediment-Derived Fungus
Source: MDPI journal article supplement (doi:10.3390/md11062230), 2013-06-21
Supplement: s5 [file s5]

marinedrugs-11-02230-s002.mol
  ChemDraw02071408502D

 15 16  0  0  0  0  0  0  0  0999 V2000
   -1.4634    0.2785    0.0000 C   0  0  0  0  0  0  0  0  0  0  0  0
   -1.4634   -0.5465    0.0000 C   0  0  0  0  0  0  0  0  0  0  0  0
   -0.7490   -0.9590    0.0000 C   0  0  0  0  0  0  0  0  0  0  0  0
   -0.0345   -0.5465    0.0000 C   0  0  0  0  0  0  0  0  0  0  0  0
   -0.0345    0.2785    0.0000 C   0  0  0  0  0  0  0  0  0  0  0  0
   -0.7490    0.6910    0.0000 C   0  0  0  0  0  0  0  0  0  0  0  0
    0.7501   -0.8015    0.0000 C   0  0  0  0  0  0  0  0  0  0  0  0
    1.2351   -0.1340    0.0000 O   0  0  0  0  0  0  0  0  0  0  0  0
    0.7501    0.5334    0.0000 C   0  0  0  0  0  0  0  0  0  0  0  0
   -0.7490    1.5160    0.0000 O   0  0  0  0  0  0  0  0  0  0  0  0
   -2.1779    0.6910    0.0000 O   0  0  0  0  0  0  0  0  0  0  0  0
    0.9637    1.3303    0.0000 O   0  0  0  0  0  0  0  0  0  0  0  0
    0.3376   -1.5160    0.0000 C   0  0  0  0  0  0  0  0  0  0  0  0
    1.4634   -0.8009    0.0000 O   0  0  0  0  0  0  0  0  0  0  0  0
    2.1779   -1.2134    0.0000 C   0  0  0  0  0  0  0  0  0  0  0  0
  1  2  2  0      
  2  3  1  0      
  3  4  2  0      
  4  5  1  0      
  5  6  2  0      
  6  1  1  0      
  4  7  1  0      
  7  8  1  0      
  8  9  1  0      
  9  5  1  0      
  6 10  1  0      
  1 11  1  0      
  9 12  2  0      
  7 13  1  1      
  7 14  1  6      
 14 15  1  0      
M  STY  1   1 SUP
M  SLB  1   1   1
M  SAL   1  2  14  15
M  SBL   1  1  15
M  SMT   1 OMe
M  SBV   1 15   -6.1200    5.5796
M  END
