# Supplementary material for: Secondary Metabolites from Penicillium pinophilum SD-272, a Marine Sediment-Derived Fungus
Source: MDPI journal article supplement (doi:10.3390/md11062230), 2013-06-21
Supplement: s6 [file s6]

marinedrugs-11-02230-s003.mol
  corina  04151402473D 1   1.00000     0.00000 
CORINA 3.49 0023  12.04.2013
 21 23  0  0  0  0  0  0  0  0999 V2000
   -0.0167    1.3831    0.0096 C   0  0  0  0  0  0  0  0  0  0  0  0
    0.0021   -0.0041    0.0020 C   0  0  0  0  0  0  0  0  0  0  0  0
    1.2132   -0.6757    0.0004 C   0  0  0  0  0  0  0  0  0  0  0  0
    2.3974    0.0388   -0.0197 C   0  0  0  0  0  0  0  0  0  0  0  0
    2.3844    1.4486   -0.0659 C   0  0  0  0  0  0  0  0  0  0  0  0
    1.1633    2.1066    0.0023 C   0  0  0  0  0  0  0  0  0  0  0  0
    3.5796   -0.6331    0.0451 O   0  0  0  0  0  0  0  0  0  0  0  0
    4.5788    0.0134    0.7006 C   0  0  0  0  0  0  0  0  0  0  0  0
    4.8199    1.4028    0.2868 C   0  0  0  0  0  0  0  0  0  0  0  0
    3.6891    2.1290   -0.1777 C   0  0  0  0  0  0  0  0  0  0  0  0
    6.0800    1.9965    0.3337 C   0  0  0  0  0  0  0  0  0  0  0  0
    6.2473    3.2718   -0.1812 C   0  0  0  0  0  0  0  0  0  0  0  0
    5.1636    3.9480   -0.7262 C   0  0  0  0  0  0  0  0  0  0  0  0
    3.8951    3.3773   -0.7314 C   0  0  0  0  0  0  0  0  0  0  0  0
    1.0531    3.6040    0.1396 C   0  0  0  0  0  0  0  0  0  0  0  0
   -1.1617   -0.7030   -0.0039 O   0  0  0  0  0  0  0  0  0  0  0  0
    5.2223   -0.5253    1.5722 O   0  0  0  0  0  0  0  0  0  0  0  0
    5.3421    5.1821   -1.2632 O   0  0  0  0  0  0  0  0  0  0  0  0
    6.6665    5.7180   -1.2317 C   0  0  0  0  0  0  0  0  0  0  0  0
    7.1361    1.3387    0.8756 O   0  0  0  0  0  0  0  0  0  0  0  0
    8.3914    2.0214    0.8825 C   0  0  0  0  0  0  0  0  0  0  0  0
  1  2  2  0      
  2  3  1  0      
  3  4  2  0      
  4  5  1  0      
  5  6  2  0      
  6  1  1  0      
  4  7  1  0      
  7  8  1  0      
  8  9  1  0      
  9 10  2  0      
 10  5  1  0      
  9 11  1  0      
 11 12  2  0      
 12 13  1  0      
 13 14  2  0      
 14 10  1  0      
  6 15  1  0      
  2 16  1  0      
  8 17  2  0      
 13 18  1  0      
 18 19  1  0      
 11 20  1  0      
 20 21  1  0      
M  STY  1   1 SUP
M  SLB  1   1   1
M  SAL   1  2  18  19
M  SBL   1  1  20
M  SMT   1 OMe
M  SBV   1 20   -6.9509    4.0425
M  STY  1   2 SUP
M  SLB  1   2   2
M  SAL   2  2  20  21
M  SBL   2  1  22
M  SMT   2 OMe
M  SBV   2 22   -6.5926    3.4238
M  END
$$$$
