# Supplementary material for: Secondary Metabolites from Penicillium pinophilum SD-272, a Marine Sediment-Derived Fungus
Source: MDPI journal article supplement (doi:10.3390/md11062230), 2013-06-21
Supplement: s7 [file s7]

marinedrugs-11-02230-s003.mol
  ChemDraw02071408502D

 21 23  0  0  0  0  0  0  0  0999 V2000
   -2.1434   -0.5156    0.0000 C   0  0  0  0  0  0  0  0  0  0  0  0
   -2.1434   -1.3406    0.0000 C   0  0  0  0  0  0  0  0  0  0  0  0
   -1.4289   -1.7531    0.0000 C   0  0  0  0  0  0  0  0  0  0  0  0
   -0.7144   -1.3406    0.0000 C   0  0  0  0  0  0  0  0  0  0  0  0
   -0.7144   -0.5156    0.0000 C   0  0  0  0  0  0  0  0  0  0  0  0
   -1.4289   -0.1031    0.0000 C   0  0  0  0  0  0  0  0  0  0  0  0
    0.0001   -1.7531    0.0000 O   0  0  0  0  0  0  0  0  0  0  0  0
    0.7145   -1.3406    0.0000 C   0  0  0  0  0  0  0  0  0  0  0  0
    0.7145   -0.5156    0.0000 C   0  0  0  0  0  0  0  0  0  0  0  0
    0.0001   -0.1031    0.0000 C   0  0  0  0  0  0  0  0  0  0  0  0
    1.4290   -0.1031    0.0000 C   0  0  0  0  0  0  0  0  0  0  0  0
    1.4290    0.7219    0.0000 C   0  0  0  0  0  0  0  0  0  0  0  0
    0.7145    1.1344    0.0000 C   0  0  0  0  0  0  0  0  0  0  0  0
    0.0001    0.7219    0.0000 C   0  0  0  0  0  0  0  0  0  0  0  0
   -1.4289    0.7219    0.0000 C   0  0  0  0  0  0  0  0  0  0  0  0
   -2.8578   -1.7531    0.0000 O   0  0  0  0  0  0  0  0  0  0  0  0
    1.4290   -1.7531    0.0000 O   0  0  0  0  0  0  0  0  0  0  0  0
    1.0706    1.7531    0.0000 O   0  0  0  0  0  0  0  0  0  0  0  0
    1.7851    1.3406    0.0000 C   0  0  0  0  0  0  0  0  0  0  0  0
    2.1434   -0.1031    0.0000 O   0  0  0  0  0  0  0  0  0  0  0  0
    2.8578   -0.5156    0.0000 C   0  0  0  0  0  0  0  0  0  0  0  0
  1  2  2  0      
  2  3  1  0      
  3  4  2  0      
  4  5  1  0      
  5  6  2  0      
  6  1  1  0      
  4  7  1  0      
  7  8  1  0      
  8  9  1  0      
  9 10  2  0      
 10  5  1  0      
  9 11  1  0      
 11 12  2  0      
 12 13  1  0      
 13 14  2  0      
 14 10  1  0      
  6 15  1  0      
  2 16  1  0      
  8 17  2  0      
 13 18  1  0      
 18 19  1  0      
 11 20  1  0      
 20 21  1  0      
M  STY  1   1 SUP
M  SLB  1   1   1
M  SAL   1  2  18  19
M  SBL   1  1  20
M  SMT   1 OMe
M  SBV   1 20   -6.9509    4.0425
M  STY  1   2 SUP
M  SLB  1   2   2
M  SAL   2  2  20  21
M  SBL   2  1  22
M  SMT   2 OMe
M  SBV   2 22   -6.5926    3.4238
M  END
