# Supplementary material for: Secondary Metabolites from Penicillium pinophilum SD-272, a Marine Sediment-Derived Fungus
Source: MDPI journal article supplement (doi:10.3390/md11062230), 2013-06-21
Supplement: s8 [file s8]

marinedrugs-11-02230-s004.mol
  corina  04151402473D 1   1.00000     0.00000 
CORINA 3.49 0023  12.04.2013
 10 10  0  0  0  0  0  0  0  0999 V2000
   -0.0143    1.2041    0.0087 C   0  0  0  0  0  0  0  0  0  0  0  0
    1.5973    2.4727   -1.4273 C   0  0  0  0  0  0  0  0  0  0  0  0
    1.2804    1.9752    0.0004 C   0  0  0  0  0  0  0  0  0  0  0  0
    2.5002    1.3377   -1.9635 C   0  0  0  0  0  0  0  0  0  0  0  0
    3.0963    0.7184   -0.7186 C   0  0  0  0  0  0  0  0  0  0  0  0
    2.3975    1.0962    0.3657 N   0  0  0  0  0  0  0  0  0  0  0  0
    0.0021   -0.0041    0.0020 O   0  0  0  0  0  0  0  0  0  0  0  0
    4.0634   -0.0133   -0.7015 O   0  0  0  0  0  0  0  0  0  0  0  0
   -1.1856    1.8593    0.0290 O   0  0  0  0  0  0  0  0  0  0  0  0
   -2.3924    1.0519    0.0420 C   0  0  0  0  0  0  0  0  0  0  0  0
  2  3  1  0      
  2  4  1  0      
  4  5  1  0      
  5  6  1  0      
  6  3  1  0      
  1  7  2  0      
  3  1  1  0      
  5  8  2  0      
  1  9  1  0      
  9 10  1  0      
M  STY  1   1 SUP
M  SLB  1   1   1
M  SAL   1  2   9  10
M  SBL   1  1   9
M  SMT   1 OMe
M  SBV   1  9   -7.8135    5.9026
M  END
$$$$
