# Supplementary material for: Secondary Metabolites from Penicillium pinophilum SD-272, a Marine Sediment-Derived Fungus
Source: MDPI journal article supplement (doi:10.3390/md11062230), 2013-06-21
Supplement: s9 [file s9]

marinedrugs-11-02230-s004.mol
  ChemDraw04151414442D

 10 10  0  0  0  0  0  0  0  0999 V2000
   -0.5151   -0.7578    0.0000 C   0  0  0  0  0  0  0  0  0  0  0  0
    0.9139   -0.7578    0.0000 C   0  0  0  0  0  0  0  0  0  0  0  0
    0.1994   -0.3453    0.0000 C   0  0  0  0  0  0  0  0  0  0  0  0
    1.5269   -0.2058    0.0000 C   0  0  0  0  0  0  0  0  0  0  0  0
    1.1913    0.5479    0.0000 C   0  0  0  0  0  0  0  0  0  0  0  0
    0.3709    0.4617    0.0000 N   0  0  0  0  0  0  0  0  0  0  0  0
   -1.2295   -0.3453    0.0000 O   0  0  0  0  0  0  0  0  0  0  0  0
    1.6038    1.2624    0.0000 O   0  0  0  0  0  0  0  0  0  0  0  0
   -1.0205   -1.2624    0.0000 O   0  0  0  0  0  0  0  0  0  0  0  0
   -1.6038   -0.6790    0.0000 C   0  0  0  0  0  0  0  0  0  0  0  0
  2  3  1  0      
  2  4  1  0      
  4  5  1  0      
  5  6  1  0      
  6  3  1  0      
  1  7  2  0      
  3  1  1  1      
  5  8  2  0      
  1  9  1  0      
  9 10  1  0      
M  STY  1   1 SUP
M  SLB  1   1   1
M  SAL   1  2   9  10
M  SBL   1  1   9
M  SMT   1 OMe
M  SBV   1  9   -7.8135    5.9026
M  END
