# Supplementary material for: Secondary Metabolites from Penicillium pinophilum SD-272, a Marine Sediment-Derived Fungus
Source: MDPI journal article supplement (doi:10.3390/md11062230), 2013-06-21
Supplement: s10 [file s10]

marinedrugs-11-02230-s005.mol
  ChemDraw02071408502D

 20 22  0  0  0  0  0  0  0  0999 V2000
   -2.7782    0.4125    0.0000 C   0  0  0  0  0  0  0  0  0  0  0  0
   -2.7782   -0.4125    0.0000 C   0  0  0  0  0  0  0  0  0  0  0  0
   -2.0637   -0.8250    0.0000 C   0  0  0  0  0  0  0  0  0  0  0  0
   -1.3492   -0.4125    0.0000 C   0  0  0  0  0  0  0  0  0  0  0  0
   -1.3492    0.4125    0.0000 C   0  0  0  0  0  0  0  0  0  0  0  0
   -2.0637    0.8250    0.0000 C   0  0  0  0  0  0  0  0  0  0  0  0
   -0.6348   -0.8250    0.0000 C   0  0  0  0  0  0  0  0  0  0  0  0
    0.0797   -0.4125    0.0000 N   0  0  0  0  0  0  0  0  0  0  0  0
    0.0797    0.4125    0.0000 C   0  0  0  0  0  0  0  0  0  0  0  0
   -0.6348    0.8250    0.0000 C   0  0  0  0  0  0  0  0  0  0  0  0
    0.7942   -0.8250    0.0000 C   0  0  0  0  0  0  0  0  0  0  0  0
    1.5086   -0.4125    0.0000 C   0  0  0  0  0  0  0  0  0  0  0  0
    1.5086    0.4125    0.0000 N   0  0  0  0  0  0  0  0  0  0  0  0
    0.7942    0.8250    0.0000 C   0  0  0  0  0  0  0  0  0  0  0  0
    2.2933   -0.6674    0.0000 C   0  0  0  0  0  0  0  0  0  0  0  0
    2.7782    0.0000    0.0000 C   0  0  0  0  0  0  0  0  0  0  0  0
    2.2933    0.6674    0.0000 C   0  0  0  0  0  0  0  0  0  0  0  0
    0.7942    1.6500    0.0000 O   0  0  0  0  0  0  0  0  0  0  0  0
    0.7942   -1.6500    0.0000 O   0  0  0  0  0  0  0  0  0  0  0  0
    1.5086   -1.2375    0.0000 H   0  0  0  0  0  0  0  0  0  0  0  0
  1  2  2  0      
  2  3  1  0      
  3  4  2  0      
  4  5  1  0      
  5  6  2  0      
  6  1  1  0      
  7  8  1  0      
  8  9  1  0      
  9 10  2  0      
 10  5  1  0      
  8 11  1  0      
 11 12  1  0      
 12 13  1  0      
 13 14  1  0      
 14  9  1  0      
 12 15  1  0      
 15 16  1  0      
 16 17  1  0      
 17 13  1  0      
 14 18  2  0      
 11 19  2  0      
 12 20  1  1      
M  END
