# Supplementary material for: Secondary Metabolites from Penicillium pinophilum SD-272, a Marine Sediment-Derived Fungus
Source: MDPI journal article supplement (doi:10.3390/md11062230), 2013-06-21
Supplement: s11 [file s11]

marinedrugs-11-02230-s005.mol
  corina  04151402473D 1   1.00000     0.00000 
CORINA 3.49 0023  12.04.2013
 20 22  0  0  0  0  0  0  0  0999 V2000
    0.8615   -0.4371    0.2636 C   0  0  0  0  0  0  0  0  0  0  0  0
   -0.1343    0.0815   -0.5458 C   0  0  0  0  0  0  0  0  0  0  0  0
    0.0749    1.2568   -1.2461 C   0  0  0  0  0  0  0  0  0  0  0  0
    1.2789    1.9206   -1.1420 C   0  0  0  0  0  0  0  0  0  0  0  0
    2.2903    1.4031   -0.3262 C   0  0  0  0  0  0  0  0  0  0  0  0
    2.0711    0.2148    0.3782 C   0  0  0  0  0  0  0  0  0  0  0  0
    1.3289    3.6962    0.7522 C   0  0  0  0  0  0  0  0  0  0  0  0
    2.4467    4.2222   -0.0352 N   0  0  0  0  0  0  0  0  0  0  0  0
    3.6138    3.4569   -0.2068 C   0  0  0  0  0  0  0  0  0  0  0  0
    3.5782    2.1048   -0.2099 C   0  0  0  0  0  0  0  0  0  0  0  0
    2.3612    5.4434   -0.6062 C   0  0  0  0  0  0  0  0  0  0  0  0
    3.4909    5.9610   -1.4568 C   0  0  0  0  0  0  0  0  0  0  0  0
    4.7655    5.4367   -0.9251 N   0  0  0  0  0  0  0  0  0  0  0  0
    4.8867    4.1996   -0.3837 C   0  0  0  0  0  0  0  0  0  0  0  0
    3.6114    7.4947   -1.2941 C   0  0  0  0  0  0  0  0  0  0  0  0
    5.1090    7.7248   -1.6354 C   0  0  0  0  0  0  0  0  0  0  0  0
    5.7959    6.4666   -1.0581 C   0  0  0  0  0  0  0  0  0  0  0  0
    5.9630    3.7339   -0.0602 O   0  0  0  0  0  0  0  0  0  0  0  0
    1.3723    6.1243   -0.4336 O   0  0  0  0  0  0  0  0  0  0  0  0
    3.3553    5.6773   -2.5005 H   0  0  0  0  0  0  0  0  0  0  0  0
  1  2  2  0      
  2  3  1  0      
  3  4  2  0      
  4  5  1  0      
  5  6  2  0      
  6  1  1  0      
  7  8  1  0      
  8  9  1  0      
  9 10  2  0      
 10  5  1  0      
  8 11  1  0      
 11 12  1  0      
 12 13  1  0      
 13 14  1  0      
 14  9  1  0      
 12 15  1  0      
 15 16  1  0      
 16 17  1  0      
 17 13  1  0      
 14 18  2  0      
 11 19  2  0      
 12 20  1  0      
M  END
$$$$
