# Supplementary material for: Secondary Metabolites from Penicillium pinophilum SD-272, a Marine Sediment-Derived Fungus
Source: MDPI journal article supplement (doi:10.3390/md11062230), 2013-06-21
Supplement: s12 [file s12]

marinedrugs-11-02230-s006.mol
  corina  04151402483D 1   1.00000     0.00000 
CORINA 3.49 0023  12.04.2013
 21 23  0  0  0  0  0  0  0  0999 V2000
   -0.0167    1.3781    0.0096 C   0  0  0  0  0  0  0  0  0  0  0  0
    0.0021   -0.0041    0.0020 C   0  0  0  0  0  0  0  0  0  0  0  0
    1.2084   -0.6789   -0.0132 C   0  0  0  0  0  0  0  0  0  0  0  0
    2.3960    0.0285   -0.0212 C   0  0  0  0  0  0  0  0  0  0  0  0
    2.3773    1.4107   -0.0145 C   0  0  0  0  0  0  0  0  0  0  0  0
    1.1710    2.0855    0.0021 C   0  0  0  0  0  0  0  0  0  0  0  0
    4.3976    1.1805   -2.1295 N   0  0  0  0  0  0  0  0  0  0  0  0
    4.0969    2.4497   -1.4680 C   0  0  0  0  0  0  0  0  0  0  0  0
    3.6720    2.1819   -0.0228 C   0  0  0  0  0  0  0  0  0  0  0  0
    5.2388    1.1028   -3.1777 C   0  0  0  0  0  0  0  0  0  0  0  0
    5.9367    2.3428   -3.6791 C   0  0  0  0  0  0  0  0  0  0  0  0
    6.1658    3.2253   -2.5170 N   0  0  0  0  0  0  0  0  0  0  0  0
    5.3238    3.3346   -1.4758 C   0  0  0  0  0  0  0  0  0  0  0  0
    7.3255    1.9783   -4.2318 C   0  0  0  0  0  0  0  0  0  0  0  0
    8.3306    2.7497   -3.3438 C   0  0  0  0  0  0  0  0  0  0  0  0
    7.4622    3.8826   -2.7350 C   0  0  0  0  0  0  0  0  0  0  0  0
    5.5397    4.1159   -0.5736 O   0  0  0  0  0  0  0  0  0  0  0  0
    5.4359    0.0355   -3.7188 O   0  0  0  0  0  0  0  0  0  0  0  0
    5.3288    2.8474   -4.4301 H   0  0  0  0  0  0  0  0  0  0  0  0
    3.2864    2.9510   -1.9971 H   0  0  0  0  0  0  0  0  0  0  0  0
    9.3889    3.2943   -4.1347 O   0  0  0  0  0  0  0  0  0  0  0  0
  1  2  2  0      
  2  3  1  0      
  3  4  2  0      
  4  5  1  0      
  5  6  2  0      
  6  1  1  0      
  7  8  1  0      
  8  9  1  0      
  9  5  1  0      
  7 10  1  0      
 10 11  1  0      
 11 12  1  0      
 12 13  1  0      
 13  8  1  0      
 11 14  1  0      
 14 15  1  0      
 15 16  1  0      
 16 12  1  0      
 13 17  2  0      
 10 18  2  0      
  8 20  1  0      
 11 19  1  0      
 15 21  1  0      
M  END
$$$$
