# Supplementary material for: Secondary Metabolites from Penicillium pinophilum SD-272, a Marine Sediment-Derived Fungus
Source: MDPI journal article supplement (doi:10.3390/md11062230), 2013-06-21
Supplement: s13 [file s13]

marinedrugs-11-02230-s006.mol
  ChemDraw02071408502D

 21 23  0  0  0  0  0  0  0  0999 V2000
   -3.1907    0.4125    0.0000 C   0  0  0  0  0  0  0  0  0  0  0  0
   -3.1907   -0.4125    0.0000 C   0  0  0  0  0  0  0  0  0  0  0  0
   -2.4762   -0.8250    0.0000 C   0  0  0  0  0  0  0  0  0  0  0  0
   -1.7617   -0.4125    0.0000 C   0  0  0  0  0  0  0  0  0  0  0  0
   -1.7617    0.4125    0.0000 C   0  0  0  0  0  0  0  0  0  0  0  0
   -2.4762    0.8250    0.0000 C   0  0  0  0  0  0  0  0  0  0  0  0
   -0.3328   -0.4125    0.0000 N   0  0  0  0  0  0  0  0  0  0  0  0
   -0.3328    0.4125    0.0000 C   0  0  0  0  0  0  0  0  0  0  0  0
   -1.0473    0.8250    0.0000 C   0  0  0  0  0  0  0  0  0  0  0  0
    0.3817   -0.8250    0.0000 C   0  0  0  0  0  0  0  0  0  0  0  0
    1.0961   -0.4125    0.0000 C   0  0  0  0  0  0  0  0  0  0  0  0
    1.0961    0.4125    0.0000 N   0  0  0  0  0  0  0  0  0  0  0  0
    0.3817    0.8250    0.0000 C   0  0  0  0  0  0  0  0  0  0  0  0
    1.8808   -0.6674    0.0000 C   0  0  0  0  0  0  0  0  0  0  0  0
    2.3657    0.0000    0.0000 C   0  0  0  0  0  0  0  0  0  0  0  0
    1.8808    0.6674    0.0000 C   0  0  0  0  0  0  0  0  0  0  0  0
    0.3817    1.6500    0.0000 O   0  0  0  0  0  0  0  0  0  0  0  0
    0.3817   -1.6500    0.0000 O   0  0  0  0  0  0  0  0  0  0  0  0
    1.0961   -1.2375    0.0000 H   0  0  0  0  0  0  0  0  0  0  0  0
   -0.3328    1.2375    0.0000 H   0  0  0  0  0  0  0  0  0  0  0  0
    3.1907    0.0000    0.0000 O   0  0  0  0  0  0  0  0  0  0  0  0
  1  2  2  0      
  2  3  1  0      
  3  4  2  0      
  4  5  1  0      
  5  6  2  0      
  6  1  1  0      
  7  8  1  0      
  8  9  1  0      
  9  5  1  0      
  7 10  1  0      
 10 11  1  0      
 11 12  1  0      
 12 13  1  0      
 13  8  1  0      
 11 14  1  0      
 14 15  1  0      
 15 16  1  0      
 16 12  1  0      
 13 17  2  0      
 10 18  2  0      
  8 20  1  6      
 11 19  1  6      
 15 21  1  6      
M  END
