# Supplementary material for: Secondary Metabolites from Penicillium pinophilum SD-272, a Marine Sediment-Derived Fungus
Source: MDPI journal article supplement (doi:10.3390/md11062230), 2013-06-21
Supplement: s14 [file s14]

marinedrugs-11-02230-s007.mol
  corina  04151402483D 1   1.00000     0.00000 
CORINA 3.49 0023  12.04.2013
 16 17  0  0  0  0  0  0  0  0999 V2000
    0.7029   -0.4065    1.3012 C   0  0  0  0  0  0  0  0  0  0  0  0
   -2.1141   -0.0714    1.2212 N   0  0  0  0  0  0  0  0  0  0  0  0
   -1.4333   -0.5337    0.0117 C   0  0  0  0  0  0  0  0  0  0  0  0
    0.0021   -0.0041    0.0020 C   0  0  0  0  0  0  0  0  0  0  0  0
   -3.1642   -0.7371    1.7394 C   0  0  0  0  0  0  0  0  0  0  0  0
   -3.6389   -2.0121    1.0887 C   0  0  0  0  0  0  0  0  0  0  0  0
   -2.4534   -2.7005    0.5341 N   0  0  0  0  0  0  0  0  0  0  0  0
   -1.4114   -2.0449   -0.0181 C   0  0  0  0  0  0  0  0  0  0  0  0
   -4.1720   -2.9805    2.1710 C   0  0  0  0  0  0  0  0  0  0  0  0
   -3.9284   -4.3597    1.5002 C   0  0  0  0  0  0  0  0  0  0  0  0
   -2.6089   -4.1428    0.7265 C   0  0  0  0  0  0  0  0  0  0  0  0
   -0.4877   -2.6481   -0.5218 O   0  0  0  0  0  0  0  0  0  0  0  0
   -3.7261   -0.3125    2.7268 O   0  0  0  0  0  0  0  0  0  0  0  0
   -4.3810   -1.8109    0.3160 H   0  0  0  0  0  0  0  0  0  0  0  0
   -1.9623   -0.1627   -0.8661 H   0  0  0  0  0  0  0  0  0  0  0  0
   -0.0180    1.5213   -0.1153 C   0  0  0  0  0  0  0  0  0  0  0  0
  2  3  1  0      
  3  4  1  0      
  4  1  1  0      
  2  5  1  0      
  5  6  1  0      
  6  7  1  0      
  7  8  1  0      
  8  3  1  0      
  6  9  1  0      
  9 10  1  0      
 10 11  1  0      
 11  7  1  0      
  8 12  2  0      
  5 13  2  0      
  3 15  1  0      
  6 14  1  0      
  4 16  1  0      
M  END
$$$$
