# Supplementary material for: Secondary Metabolites from Penicillium pinophilum SD-272, a Marine Sediment-Derived Fungus
Source: MDPI journal article supplement (doi:10.3390/md11062230), 2013-06-21
Supplement: s15 [file s15]

marinedrugs-11-02230-s007.mol
  ChemDraw02071408502D

 16 17  0  0  0  0  0  0  0  0999 V2000
   -2.0637    0.4125    0.0000 C   0  0  0  0  0  0  0  0  0  0  0  0
   -0.6348   -0.4125    0.0000 N   0  0  0  0  0  0  0  0  0  0  0  0
   -0.6348    0.4125    0.0000 C   0  0  0  0  0  0  0  0  0  0  0  0
   -1.3492    0.8250    0.0000 C   0  0  0  0  0  0  0  0  0  0  0  0
    0.0797   -0.8250    0.0000 C   0  0  0  0  0  0  0  0  0  0  0  0
    0.7942   -0.4125    0.0000 C   0  0  0  0  0  0  0  0  0  0  0  0
    0.7942    0.4125    0.0000 N   0  0  0  0  0  0  0  0  0  0  0  0
    0.0797    0.8250    0.0000 C   0  0  0  0  0  0  0  0  0  0  0  0
    1.5788   -0.6674    0.0000 C   0  0  0  0  0  0  0  0  0  0  0  0
    2.0637    0.0000    0.0000 C   0  0  0  0  0  0  0  0  0  0  0  0
    1.5788    0.6674    0.0000 C   0  0  0  0  0  0  0  0  0  0  0  0
    0.0797    1.6500    0.0000 O   0  0  0  0  0  0  0  0  0  0  0  0
    0.0797   -1.6500    0.0000 O   0  0  0  0  0  0  0  0  0  0  0  0
    0.7942   -1.2375    0.0000 H   0  0  0  0  0  0  0  0  0  0  0  0
   -0.6348    1.2375    0.0000 H   0  0  0  0  0  0  0  0  0  0  0  0
   -1.3492    1.6500    0.0000 C   0  0  0  0  0  0  0  0  0  0  0  0
  2  3  1  0      
  3  4  1  0      
  4  1  1  0      
  2  5  1  0      
  5  6  1  0      
  6  7  1  0      
  7  8  1  0      
  8  3  1  0      
  6  9  1  0      
  9 10  1  0      
 10 11  1  0      
 11  7  1  0      
  8 12  2  0      
  5 13  2  0      
  3 15  1  6      
  6 14  1  6      
  4 16  1  0      
M  END
