# Supplementary material for: Secondary Metabolites from Penicillium pinophilum SD-272, a Marine Sediment-Derived Fungus
Source: MDPI journal article supplement (doi:10.3390/md11062230), 2013-06-21
Supplement: s16 [file s16]

marinedrugs-11-02230-s008.mol
  corina  04151402483D 1   1.00000     0.00000 
CORINA 3.49 0023  12.04.2013
 15 16  0  0  0  0  0  0  0  0999 V2000
   -0.0167    1.3830    0.0096 C   0  0  0  0  0  0  0  0  0  0  0  0
    0.0021   -0.0041    0.0020 C   0  0  0  0  0  0  0  0  0  0  0  0
   -1.1672   -0.6968    0.0090 O   0  0  0  0  0  0  0  0  0  0  0  0
    1.1752    2.0960    0.0021 C   0  0  0  0  0  0  0  0  0  0  0  0
    2.3803    1.4224   -0.0130 C   0  0  0  0  0  0  0  0  0  0  0  0
    2.4083    0.0253   -0.0208 C   0  0  0  0  0  0  0  0  0  0  0  0
    1.2079   -0.6860   -0.0131 C   0  0  0  0  0  0  0  0  0  0  0  0
    3.8187    1.8754   -0.0235 C   0  0  0  0  0  0  0  0  0  0  0  0
    4.6295    0.6687   -0.0372 O   0  0  0  0  0  0  0  0  0  0  0  0
    3.8194   -0.4029   -0.0357 C   0  0  0  0  0  0  0  0  0  0  0  0
    1.1553    3.4549    0.0091 O   0  0  0  0  0  0  0  0  0  0  0  0
   -1.3326    2.1174    0.0199 C   0  0  0  0  0  0  0  0  0  0  0  0
    4.1950   -1.5580   -0.0447 O   0  0  0  0  0  0  0  0  0  0  0  0
    4.0789    2.6544   -1.1929 O   0  0  0  0  0  0  0  0  0  0  0  0
    5.3894    3.2226   -1.2331 C   0  0  0  0  0  0  0  0  0  0  0  0
  1  2  2  0      
  2  3  1  0      
  1  4  1  0      
  4  5  2  0      
  5  6  1  0      
  6  7  2  0      
  7  2  1  0      
  5  8  1  0      
  8  9  1  0      
  9 10  1  0      
 10  6  1  0      
  4 11  1  0      
  1 12  1  0      
 10 13  2  0      
  8 14  1  0      
 14 15  1  0      
M  STY  1   1 SUP
M  SLB  1   1   1
M  SAL   1  2  14  15
M  SBL   1  1  15
M  SMT   1 OMe
M  SBV   1 15   -7.5315    5.1990
M  END
$$$$
