# Supplementary material for: Secondary Metabolites from Penicillium pinophilum SD-272, a Marine Sediment-Derived Fungus
Source: MDPI journal article supplement (doi:10.3390/md11062230), 2013-06-21
Supplement: s17 [file s17]

marinedrugs-11-02230-s008.mol
  ChemDraw02071408502D

 15 16  0  0  0  0  0  0  0  0999 V2000
   -0.9920   -0.3197    0.0000 C   0  0  0  0  0  0  0  0  0  0  0  0
   -0.9920    0.5053    0.0000 C   0  0  0  0  0  0  0  0  0  0  0  0
   -1.7065    0.9178    0.0000 O   0  0  0  0  0  0  0  0  0  0  0  0
   -0.2775   -0.7322    0.0000 C   0  0  0  0  0  0  0  0  0  0  0  0
    0.4369   -0.3197    0.0000 C   0  0  0  0  0  0  0  0  0  0  0  0
    0.4369    0.5053    0.0000 C   0  0  0  0  0  0  0  0  0  0  0  0
   -0.2775    0.9178    0.0000 C   0  0  0  0  0  0  0  0  0  0  0  0
    1.2216   -0.5746    0.0000 C   0  0  0  0  0  0  0  0  0  0  0  0
    1.7065    0.0928    0.0000 O   0  0  0  0  0  0  0  0  0  0  0  0
    1.2216    0.7603    0.0000 C   0  0  0  0  0  0  0  0  0  0  0  0
   -0.2775   -1.5572    0.0000 O   0  0  0  0  0  0  0  0  0  0  0  0
   -1.7065   -0.7322    0.0000 C   0  0  0  0  0  0  0  0  0  0  0  0
    1.4351    1.5572    0.0000 O   0  0  0  0  0  0  0  0  0  0  0  0
    0.9299   -1.0785    0.0000 O   0  0  0  0  0  0  0  0  0  0  0  0
    0.3465   -0.4951    0.0000 C   0  0  0  0  0  0  0  0  0  0  0  0
  1  2  2  0      
  2  3  1  0      
  1  4  1  0      
  4  5  2  0      
  5  6  1  0      
  6  7  2  0      
  7  2  1  0      
  5  8  1  0      
  8  9  1  0      
  9 10  1  0      
 10  6  1  0      
  4 11  1  0      
  1 12  1  0      
 10 13  2  0      
  8 14  1  1      
 14 15  1  0      
M  STY  1   1 SUP
M  SLB  1   1   1
M  SAL   1  2  14  15
M  SBL   1  1  15
M  SMT   1 OMe
M  SBV   1 15   -7.5315    5.1990
M  END
