# Supplementary material for: Secondary Metabolites from Penicillium pinophilum SD-272, a Marine Sediment-Derived Fungus
Source: MDPI journal article supplement (doi:10.3390/md11062230), 2013-06-21
Supplement: s18 [file s18]

marinedrugs-11-02230-s009.mol
  corina  04151402483D 1   1.00000     0.00000 
CORINA 3.49 0023  12.04.2013
 21 23  0  0  0  0  0  0  0  0999 V2000
   -0.0186    1.5232    0.0104 C   0  0  0  0  0  0  0  0  0  0  0  0
    0.0021   -0.0041    0.0020 C   0  0  0  0  0  0  0  0  0  0  0  0
    0.7747   -0.4843    1.2382 C   0  0  0  0  0  0  0  0  0  0  0  0
    2.1833    0.0409    1.1311 C   0  0  0  0  0  0  0  0  0  0  0  0
    2.4351    1.1963    0.5493 C   0  0  0  0  0  0  0  0  0  0  0  0
    1.3743    2.1061    0.0002 C   0  0  0  0  0  0  0  0  0  0  0  0
    3.8421    1.6288    0.3615 C   0  0  0  0  0  0  0  0  0  0  0  0
    4.1014    2.6161   -0.6171 C   0  0  0  0  0  0  0  0  0  0  0  0
    2.9795    3.1769   -1.3848 C   0  0  0  0  0  0  0  0  0  0  0  0
    1.7726    2.5556   -1.3228 O   0  0  0  0  0  0  0  0  0  0  0  0
    4.8772    1.0956    1.1074 C   0  0  0  0  0  0  0  0  0  0  0  0
    6.1790    1.5332    0.8856 C   0  0  0  0  0  0  0  0  0  0  0  0
    6.4432    2.4977   -0.0780 C   0  0  0  0  0  0  0  0  0  0  0  0
    5.4164    3.0434   -0.8319 C   0  0  0  0  0  0  0  0  0  0  0  0
    3.1291    4.1755   -2.0619 O   0  0  0  0  0  0  0  0  0  0  0  0
    5.6841    3.9850   -1.7708 O   0  0  0  0  0  0  0  0  0  0  0  0
    1.3469    3.3502    0.8904 C   0  0  0  0  0  0  0  0  0  0  0  0
   -1.3359   -0.5038    0.0466 O   0  0  0  0  0  0  0  0  0  0  0  0
    0.1573    0.0233    2.4227 O   0  0  0  0  0  0  0  0  0  0  0  0
    7.1980    1.0142    1.6165 O   0  0  0  0  0  0  0  0  0  0  0  0
    8.5109    1.5060    1.3400 C   0  0  0  0  0  0  0  0  0  0  0  0
  1  2  1  0      
  2  3  1  0      
  3  4  1  0      
  4  5  2  0      
  5  6  1  0      
  6  1  1  0      
  5  7  1  0      
  7  8  2  0      
  8  9  1  0      
  9 10  1  0      
 10  6  1  0      
  7 11  1  0      
 11 12  2  0      
 12 13  1  0      
 13 14  2  0      
 14  8  1  0      
  9 15  2  0      
 14 16  1  0      
  6 17  1  0      
  2 18  1  0      
  3 19  1  4      
 12 20  1  0      
 20 21  1  0      
M  STY  1   1 SUP
M  SLB  1   1   1
M  SAL   1  2  20  21
M  SBL   1  1  22
M  SMT   1 OMe
M  SBV   1 22   -6.1801    3.6713
M  END
$$$$
