# Supplementary material for: Secondary Metabolites from Penicillium pinophilum SD-272, a Marine Sediment-Derived Fungus
Source: MDPI journal article supplement (doi:10.3390/md11062230), 2013-06-21
Supplement: s19 [file s19]

marinedrugs-11-02230-s009.mol
  ChemDraw02071408512D

 21 23  0  0  0  0  0  0  0  0999 V2000
   -2.1434   -0.2062    0.0000 C   0  0  0  0  0  0  0  0  0  0  0  0
   -2.1434   -1.0313    0.0000 C   0  0  0  0  0  0  0  0  0  0  0  0
   -1.4289   -1.4438    0.0000 C   0  0  0  0  0  0  0  0  0  0  0  0
   -0.7144   -1.0313    0.0000 C   0  0  0  0  0  0  0  0  0  0  0  0
   -0.7144   -0.2062    0.0000 C   0  0  0  0  0  0  0  0  0  0  0  0
   -1.4289    0.2062    0.0000 C   0  0  0  0  0  0  0  0  0  0  0  0
    0.0001    0.2062    0.0000 C   0  0  0  0  0  0  0  0  0  0  0  0
    0.0001    1.0313    0.0000 C   0  0  0  0  0  0  0  0  0  0  0  0
   -0.7144    1.4438    0.0000 C   0  0  0  0  0  0  0  0  0  0  0  0
   -1.4289    1.0313    0.0000 O   0  0  0  0  0  0  0  0  0  0  0  0
    0.7145   -0.2062    0.0000 C   0  0  0  0  0  0  0  0  0  0  0  0
    1.4290    0.2062    0.0000 C   0  0  0  0  0  0  0  0  0  0  0  0
    1.4290    1.0313    0.0000 C   0  0  0  0  0  0  0  0  0  0  0  0
    0.7145    1.4438    0.0000 C   0  0  0  0  0  0  0  0  0  0  0  0
   -0.7144    2.2687    0.0000 O   0  0  0  0  0  0  0  0  0  0  0  0
    0.7145    2.2687    0.0000 O   0  0  0  0  0  0  0  0  0  0  0  0
   -2.1434    0.6188    0.0000 C   0  0  0  0  0  0  0  0  0  0  0  0
   -2.8578   -1.4438    0.0000 O   0  0  0  0  0  0  0  0  0  0  0  0
   -1.4289   -2.2687    0.0000 O   0  0  0  0  0  0  0  0  0  0  0  0
    2.1434    0.2063    0.0000 O   0  0  0  0  0  0  0  0  0  0  0  0
    2.8578   -0.2062    0.0000 C   0  0  0  0  0  0  0  0  0  0  0  0
  1  2  1  0      
  2  3  1  0      
  3  4  1  0      
  4  5  2  0      
  5  6  1  0      
  6  1  1  0      
  5  7  1  0      
  7  8  2  0      
  8  9  1  0      
  9 10  1  0      
 10  6  1  0      
  7 11  1  0      
 11 12  2  0      
 12 13  1  0      
 13 14  2  0      
 14  8  1  0      
  9 15  2  0      
 14 16  1  0      
  6 17  1  1      
  2 18  1  1      
  3 19  1  4      
 12 20  1  0      
 20 21  1  0      
M  STY  1   1 SUP
M  SLB  1   1   1
M  SAL   1  2  20  21
M  SBL   1  1  22
M  SMT   1 OMe
M  SBV   1 22   -6.1801    3.6713
M  END
