# Supplementary material for: Secondary Metabolites from Penicillium pinophilum SD-272, a Marine Sediment-Derived Fungus
Source: MDPI journal article supplement (doi:10.3390/md11062230), 2013-06-21
Supplement: s20 [file s20]

marinedrugs-11-02230-s010.mol
  corina  04151402483D 1   1.00000     0.00000 
CORINA 3.49 0023  12.04.2013
 15 16  0  0  0  0  0  0  0  0999 V2000
   -0.0167    1.3805    0.0096 C   0  0  0  0  0  0  0  0  0  0  0  0
    0.0021   -0.0041    0.0020 C   0  0  0  0  0  0  0  0  0  0  0  0
    1.2088   -0.6866   -0.0131 C   0  0  0  0  0  0  0  0  0  0  0  0
    2.3942    0.0074   -0.0203 C   0  0  0  0  0  0  0  0  0  0  0  0
    2.3961    1.4071   -0.0128 C   0  0  0  0  0  0  0  0  0  0  0  0
    1.1770    2.0958    0.0021 C   0  0  0  0  0  0  0  0  0  0  0  0
    3.8416   -0.4168   -0.0363 C   0  0  0  0  0  0  0  0  0  0  0  0
    4.6272    0.8066   -0.0371 O   0  0  0  0  0  0  0  0  0  0  0  0
    3.7951    1.8616   -0.0236 C   0  0  0  0  0  0  0  0  0  0  0  0
    4.1477    3.0244   -0.0213 O   0  0  0  0  0  0  0  0  0  0  0  0
    1.1596    3.4530    0.0091 O   0  0  0  0  0  0  0  0  0  0  0  0
    4.1601   -1.2446    1.2104 C   0  0  0  0  0  0  0  0  0  0  0  0
    5.5936   -1.7717    1.1202 C   0  0  0  0  0  0  0  0  0  0  0  0
   -1.2045    2.0428    0.0188 O   0  0  0  0  0  0  0  0  0  0  0  0
   -2.3912    1.2467    0.0201 C   0  0  0  0  0  0  0  0  0  0  0  0
  1  2  1  0      
  2  3  2  0      
  3  4  1  0      
  4  5  2  0      
  5  6  1  0      
  6  1  2  0      
  4  7  1  0      
  7  8  1  0      
  8  9  1  0      
  9  5  1  0      
  9 10  2  0      
  6 11  1  0      
  7 12  1  0      
 12 13  1  0      
  1 14  1  0      
 14 15  1  0      
M  STY  1   1 SUP
M  SLB  1   1   1
M  SAL   1  2  14  15
M  SBL   1  1  15
M  SMT   1 OMe
M  SBV   1 15   -6.7725    4.0166
M  END
$$$$
