# Supplementary material for: Secondary Metabolites from Penicillium pinophilum SD-272, a Marine Sediment-Derived Fungus
Source: MDPI journal article supplement (doi:10.3390/md11062230), 2013-06-21
Supplement: s21 [file s21]

marinedrugs-11-02230-s010.mol
  ChemDraw02071408512D

 15 16  0  0  0  0  0  0  0  0999 V2000
   -1.7109    0.3852    0.0000 C   0  0  0  0  0  0  0  0  0  0  0  0
   -1.7109   -0.4398    0.0000 C   0  0  0  0  0  0  0  0  0  0  0  0
   -0.9965   -0.8523    0.0000 C   0  0  0  0  0  0  0  0  0  0  0  0
   -0.2820   -0.4398    0.0000 C   0  0  0  0  0  0  0  0  0  0  0  0
   -0.2820    0.3852    0.0000 C   0  0  0  0  0  0  0  0  0  0  0  0
   -0.9965    0.7977    0.0000 C   0  0  0  0  0  0  0  0  0  0  0  0
    0.5026   -0.6947    0.0000 C   0  0  0  0  0  0  0  0  0  0  0  0
    0.9875   -0.0273    0.0000 O   0  0  0  0  0  0  0  0  0  0  0  0
    0.5026    0.6402    0.0000 C   0  0  0  0  0  0  0  0  0  0  0  0
    0.7161    1.4370    0.0000 O   0  0  0  0  0  0  0  0  0  0  0  0
   -0.9965    1.6227    0.0000 O   0  0  0  0  0  0  0  0  0  0  0  0
    0.9151   -1.4092    0.0000 C   0  0  0  0  0  0  0  0  0  0  0  0
    1.7120   -1.6227    0.0000 C   0  0  0  0  0  0  0  0  0  0  0  0
   -1.7120    0.7991    0.0000 O   0  0  0  0  0  0  0  0  0  0  0  0
   -0.9975    0.3866    0.0000 C   0  0  0  0  0  0  0  0  0  0  0  0
  1  2  1  0      
  2  3  2  0      
  3  4  1  0      
  4  5  2  0      
  5  6  1  0      
  6  1  2  0      
  4  7  1  0      
  7  8  1  0      
  8  9  1  0      
  9  5  1  0      
  9 10  2  0      
  6 11  1  0      
  7 12  1  1      
 12 13  1  0      
  1 14  1  0      
 14 15  1  0      
M  STY  1   1 SUP
M  SLB  1   1   1
M  SAL   1  2  14  15
M  SBL   1  1  15
M  SMT   1 OMe
M  SBV   1 15   -6.7725    4.0166
M  END
